# Supplementary material for: Effects of Antioxidants in Reducing Accumulation of Fat in Hepatocyte
Source: MDPI journal article supplement (doi:10.3390/ijms19092563), 2018-08-29
Supplement: s1 [file s1]

## Supplementary Data (ijms-334406)-3rd revision

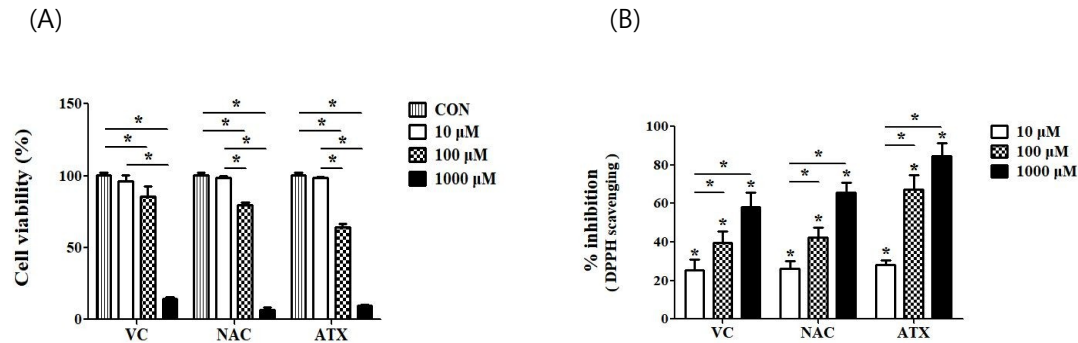

Effects of antioxidant concentrations on cell survival and radicals scavenging ability. Cell viability (%) and DPPH radical scavenging effect (%) of each antioxidant were examined in three kinds of concentration for each antioxidant, 10  $\mu$ M, 100  $\mu$ M, and 1000  $\mu$ M. Cell viability (%) was compared to between not only antioxidant concentration but also three antioxidants in comparison with control (100%) (A). DPPH free radical scavenging effect was also compared to between not only antioxidant concentration but also three antioxidants when it was compared to control DPPH scavenging effect (0% inhibition rate) (B). Data are represented as mean  $\pm$  SD values (A,  $n = 3$ ; B,  $n = 4$ ). Asterisk (\*) indicates a significant difference for antioxidant concentrations and for three kinds of antioxidants ( $p < 0.05$ ).
